# Supplementary material for: Hyper-Branched Cationic Cyclodextrin Polymers for Improving Plasmid Transfection in 2D and 3D Spheroid Cells
Source: MDPI journal article supplement (doi:10.3390/pharmaceutics14122690), 2022-12-01
Supplement: s1 [file s1]

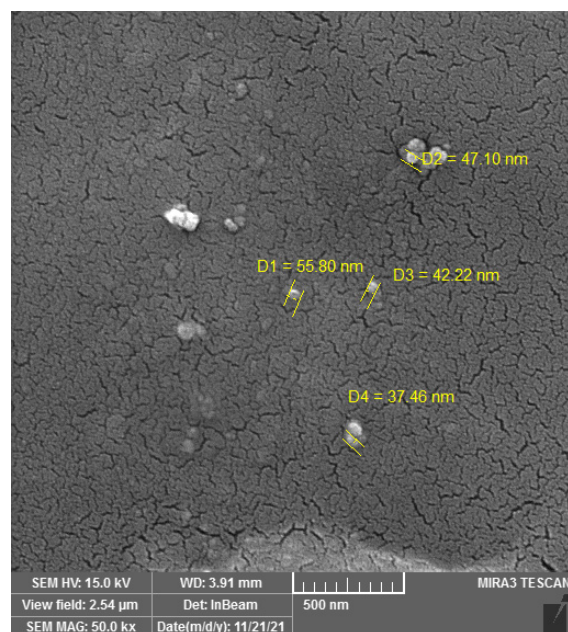

**Figure S1.** SEM image of polymer/pDNA at N/P ration of 25:1.

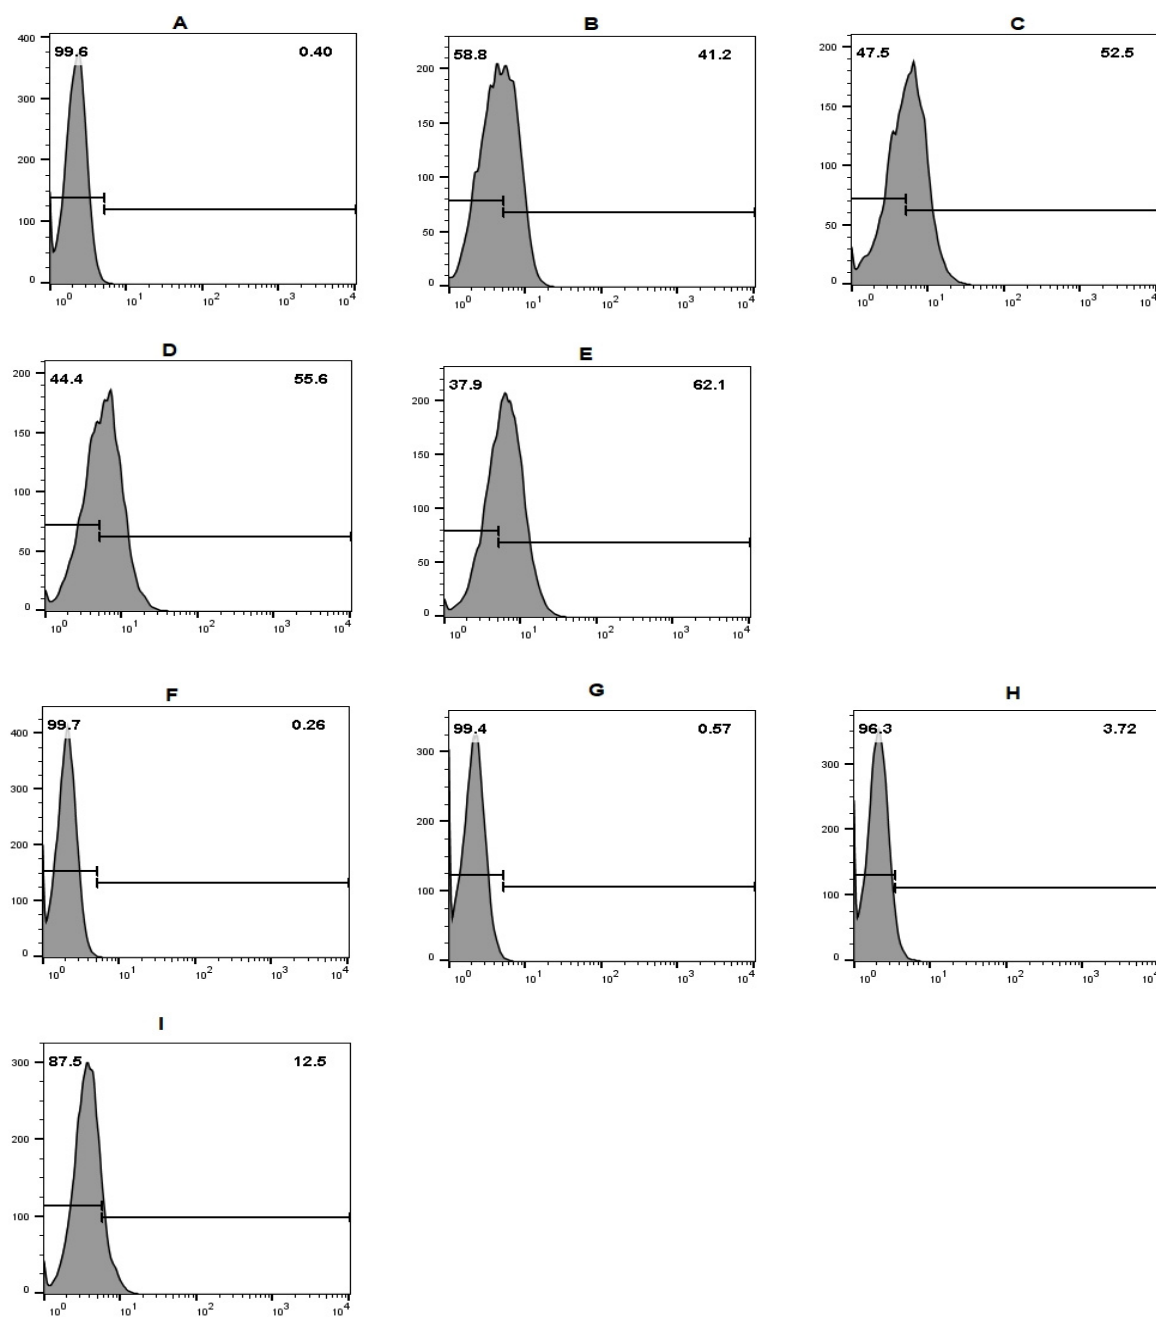

**Figure S2.** Quantitative transfection efficacy determined by the EGFP content as assessed by FACS analysis of treated 2D cells with CD/pEGFP nanocomplexes 2(B), 4(C), 6(D) and 24(E) hours at N/P ratio 25:1 in compared to free pDNA after 2(F), 4(G), 6(H) and 24(I) hours incubation and control (A).

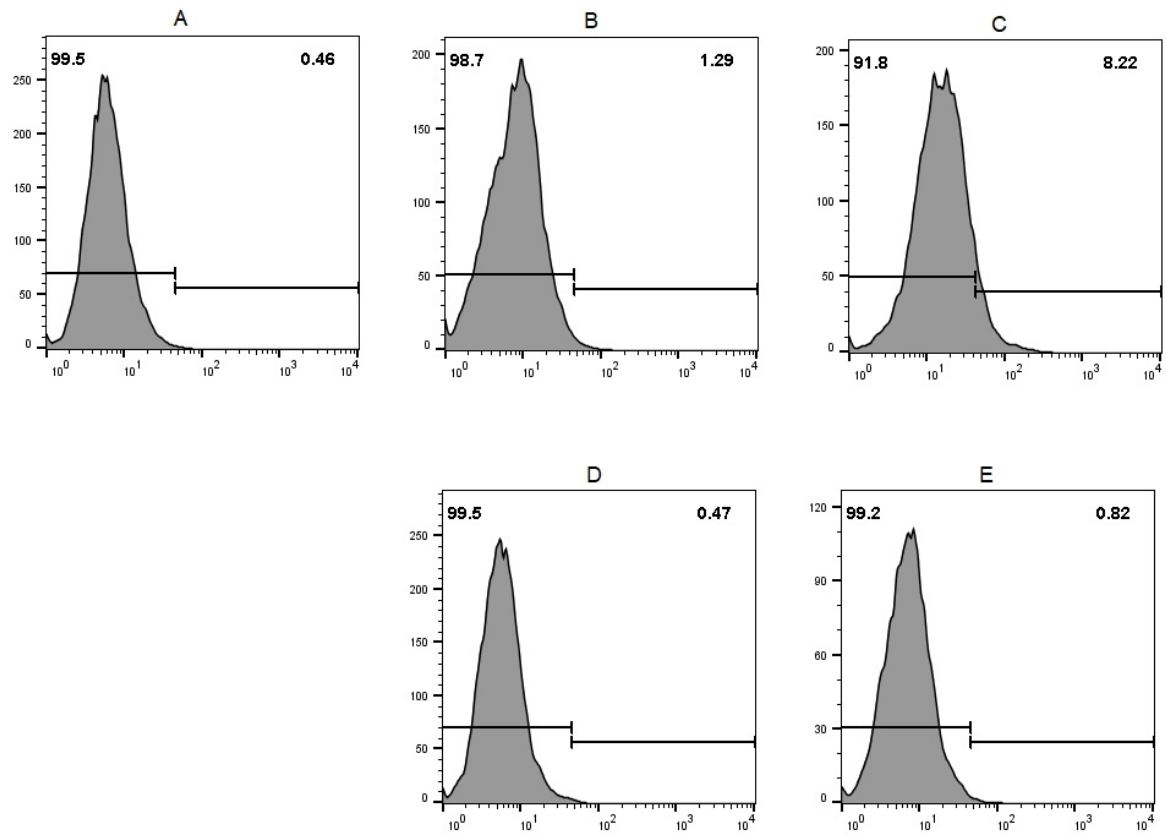

**Figure S3.** Quantitative transfection efficacy determined by the EGFP content as assessed by FACS analysis of treated 3D cells with CD/pEGFP nanocomplexes at N/P ratio 25:1 in 6(B) and 24(C) hours compared to free pDNA after 6(D) and 24(E) h incubation and control(A).
